# Supplementary material for: Predicting hospital admissions from individual patient data (IPD): an applied example to explore key elements driving external validity
Source: HighWire-hosted journal article supplement (doi:10.1136/bmjopen-2020-045572), 2021-08-01

**Supplemental Figure 1.** Patterns of complete-case data (blue) and imputed values (red) for the variables with the highest proportion of missing values. Actual values are given on the y-axis, while the x-axis represents the complete-case situation (zero) and resulting patterns from six multiple imputed datasets.

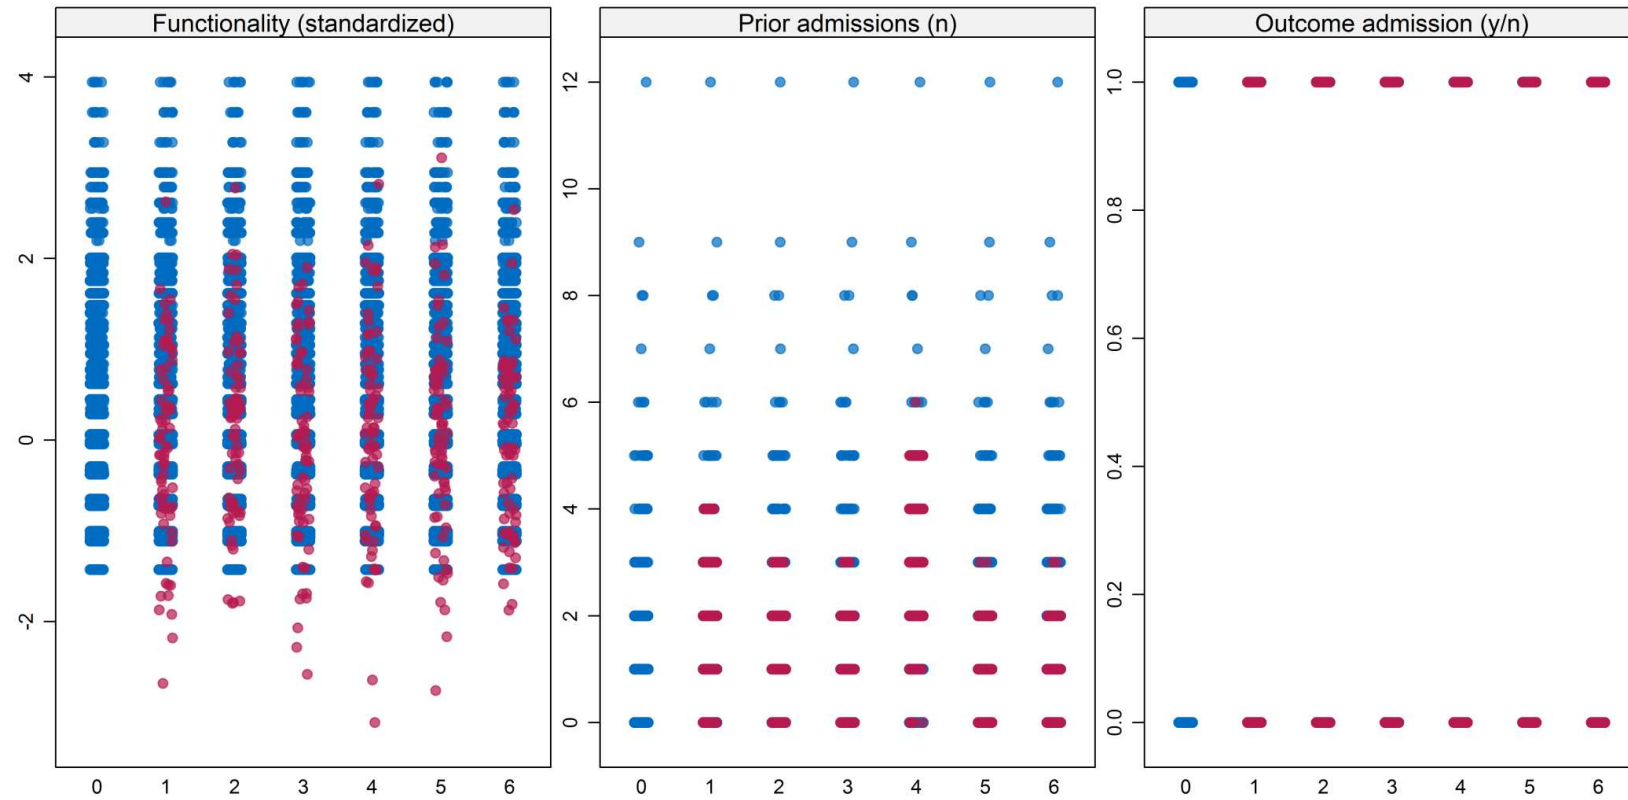

Supplement: bmjopen-2020-045572supp002_data_supplement.pdf [file bmjopen-2020-045572supp002_data_supplement.pdf]
